# Supplementary material for: Oxidant/complexing properties of the methimazole (MeImHS)/iodine system towards palladium and gold metals. Crystal structure of the complex cation [PdII(MeImHS)4]2+ balanced by a tetraiodide/iodide mixture
Source: Royal Society of Chemistry journal article supplement (doi:10.1039/c9nj05872a), 2020-01-01
Supplement: c9nj05872a1.pdf [file c9nj05872a1.pdf]

## Supporting Information

### **Oxidant/Complexing Properties of the Methimazole (MeImHS)/Iodine System Towards Palladium and Gold Metals. Crystal structure of the complex cation $[\text{Pd}^{\text{II}}(\text{MeImHS})_4]^{2+}$ balanced by a tetraiodide/iodide mixture.**

**Francesco Isaia,<sup>\*a</sup> Maria Carla Aragoni,<sup>a</sup> Massimiliano Arca,<sup>a</sup> Claudia Caltagirone,<sup>a</sup> Carlo Castellano,<sup>b</sup> Francesco Demartin,<sup>b</sup> Alessandra Garau,<sup>a</sup> Vito Lippolis,<sup>a</sup> and Tiziana Pivetta<sup>a</sup>.**

<sup>a</sup>Dipartimento di Scienze Chimiche e Geologiche, Università degli Studi di Cagliari, Cittadella Universitaria, 09042 Monserrato (CA), Italy. Tel: +39 070 6754496. E-mail: [isaia@unica.it](mailto:isaia@unica.it)

<sup>b</sup>Dipartimento di Chimica, Università degli Studi di Milano, via Golgi 19, 20133 Milano. Italy.

## Table of Contents

|                                                                                                         |         |
|---------------------------------------------------------------------------------------------------------|---------|
| Oxidative Dissolution of Metals by Thioamide – Iodine Agents: Considerations                            | page S2 |
| Scheme S1 Reactivity of Thioamide-Iodine Charge-Transfer Complexes                                      | page S2 |
| Fig. S1 Fitting of the Isotopic pattern for $[\text{Pd}(\text{L-H})\text{L}]^+$                         | page S3 |
| Fig. S2 Picture of Palladium Deposited on Magnesium Powder                                              | page S4 |
| Fig. S3 Infrared spectrum of complex $[\text{Pd}(\text{MeImHS})_4](\text{I}_4)_{0.73}(\text{I})_{0.27}$ | page S4 |
| Fig. S4 Infrared spectrum of complex $[\text{Au}(\text{MeImHS})_2]\text{I}_3$                           | page S4 |

Factors that influence the course of the reaction (1):

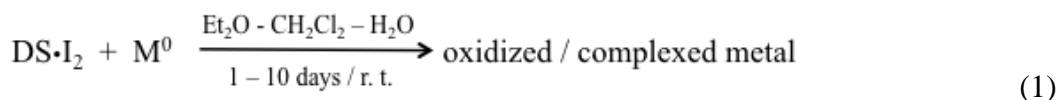

- The thioamido DS unit should be stable enough to prevent its oxidation by iodine with formation of disulphides and (poly)-iodides derivatives (Scheme S1). Under these circumstances, the oxidation/complexation of metals is not observed. If the charge-transfer complex DS-I<sub>2</sub> is in equilibrium with DS and I<sub>2</sub> (Scheme S1), due to a low value of the equilibrium constant, the latter species can react with the oxidized/complexed metal, with the result that the outcome of reaction (1) becomes unpredictable.
- Even if the oxidation of metals often occurs under the experimental conditions outlined in reaction (1), with formation of “hard” ions [R. G. Pearson: *“Hard and Soft Acids and Bases”*. *J. Am. Chem. Soc.*, **1963** *85*(22), 3533–3539], the corresponding complexes with the thioamido DS are difficult to isolate since the “soft” S-donor atom is intrinsically a poor coordinating agent towards these ions, and the formation of dense oils is commonly observed.
- Reaction conditions (solvent, temperature, reaction time, mode of stirring) and the DS/I<sub>2</sub> to M<sup>0</sup> molar ratio influence the outcome of the reaction and need to be optimised to favour both a high metal oxidation yield, and the formation of purer compounds.

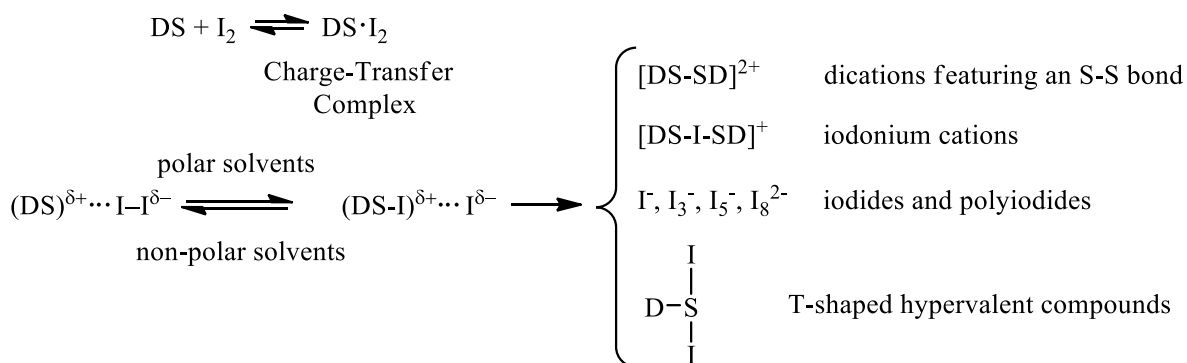

**Scheme S1** Top: in non-polar solvents, compounds containing S-donor Lewis base (DS) generally form only 1 : 1 charge-transfer complexes with I<sub>2</sub>. The formation constant of the 1 : 1 complex ( $K_f$ ) depends on the equilibrium molar concentrations according to the equation  $K_f = [\text{DS}\cdot\text{I}_2]/[\text{DS}][\text{I}_2]$ .<sup>1</sup> Bottom: the interaction between DS and I<sub>2</sub> to give 1 : 1 adducts containing an almost linear S–I–I fragment can be seen as a charge-transfer process  $n \rightarrow \sigma^*$  (i.e. MO combination of a lone pair from the donor with the empty  $\sigma^*$  orbital of I<sub>2</sub>). Depending on the charge density transferred by the DS donor molecule to I<sub>2</sub> and the nature of the solvent, this can result in lengthening of the I–I bond and finally the breaking of this bond and formation of new species.<sup>2</sup>

<sup>1</sup> M. C. Aragoni, M. Arca, F. A. Devillanova, A. Garau, F. Isaia, V. Lippolis and G. Verani, *Coord. Chem. Rev.*, 1999, 184, 271–290; and references therein. <sup>2</sup> W. T. Pennington, T. W. Hanks and H. D. Arman, in *Halogen Bonding with Dihalogens and Interhalogens: Fundamentals and Applications*, ed. P. Metrangolo and G. Resnati, Springer-Verlag, Berlin, 2008, pp. 65–104, and references therein.

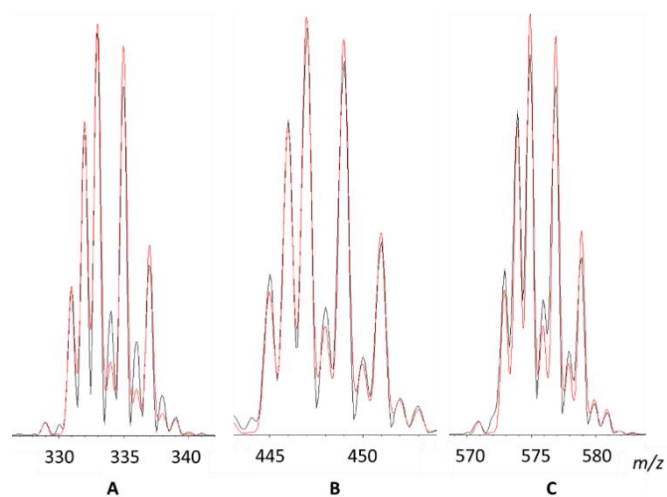

**Fig. S1** Fitting of the isotopic pattern for  $[\text{Pd}(\text{L-H})\text{L}]^+$  (333 m/z),  $[\text{Pd}(\text{L-H})\text{L}_2]^+$  (447 m/z) and  $[\text{PdL}_3\text{I}]^+$  (575 m/z), red line calculated pattern, black line experimental pattern. L = MeImHS.

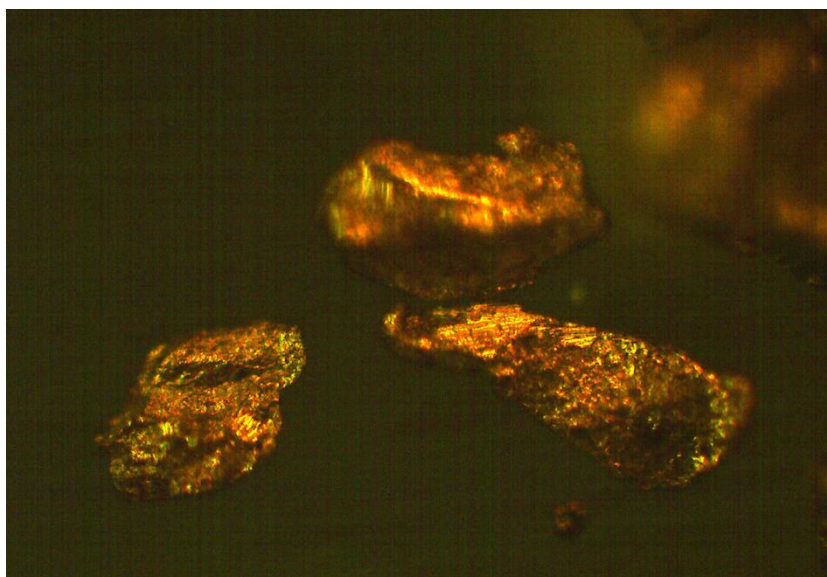

**Fig. S2** Palladium deposited on magnesium powder, image captured with a MOTIC BA210E, Epi-LED S Fluorescence attachment – Exciter 480SP Dichroic 505LP Barrier 520LP.

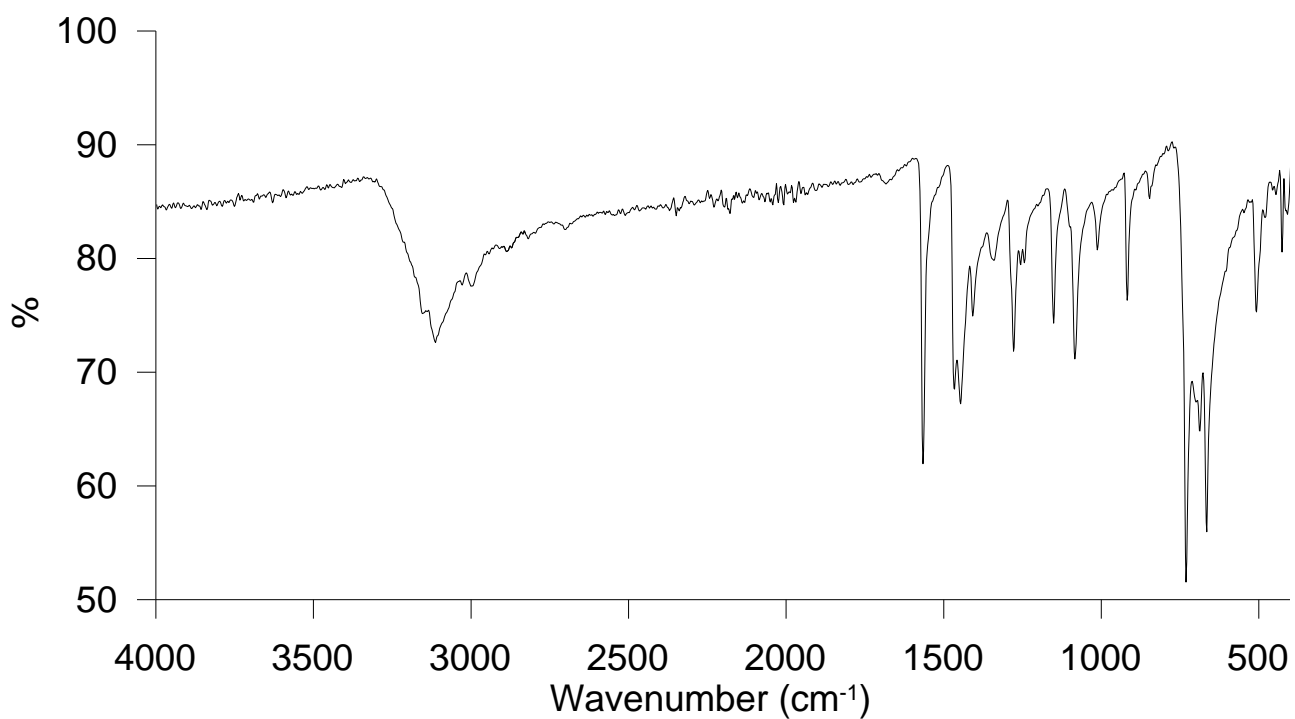

**Fig. S3** Infrared spectrum of complex  $[\text{Pd}(\text{MeImHS})_4](\text{I}_4)_{0.73}(\text{I})_{0.27}$

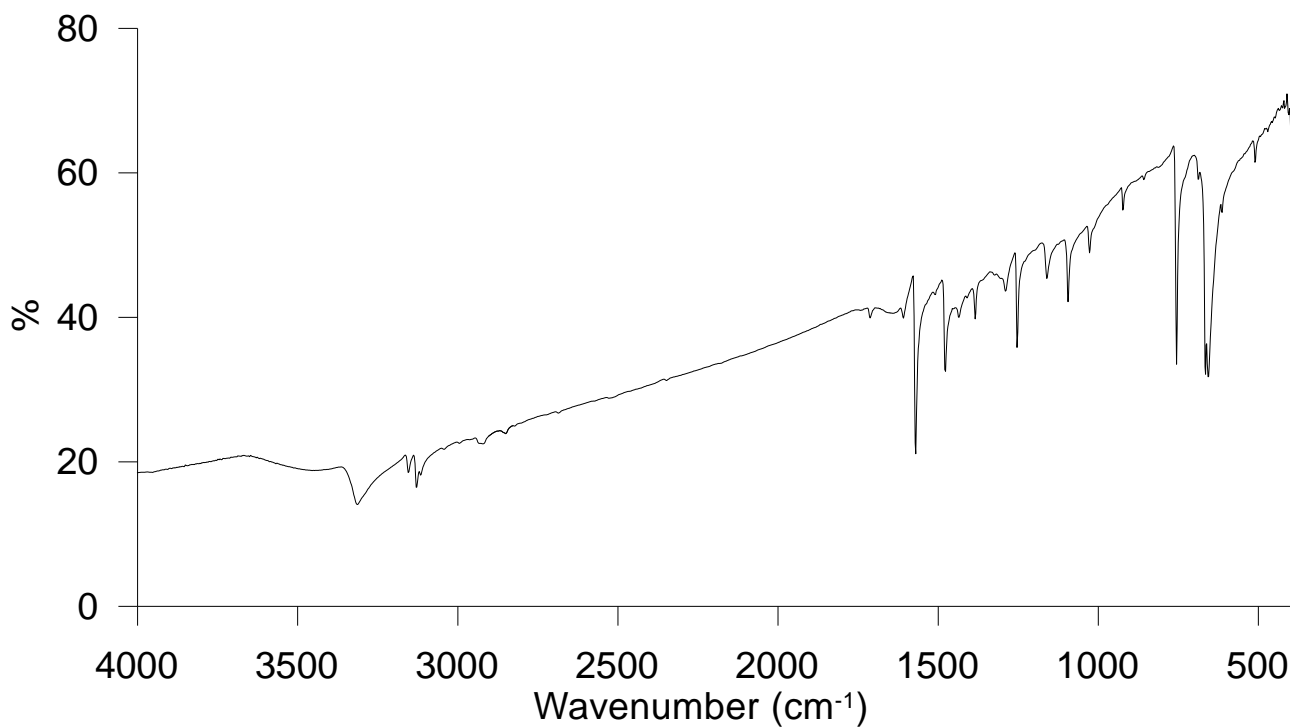

**Fig. S4** Infrared spectrum of complex  $[\text{Au}(\text{MeImHS})_2]\text{I}_3$ .
